# Supplementary material for: Enhancing binding affinity predictions through efficient sampling with a re-engineered BAR method: a test on GPCR targets
Source: Royal Society of Chemistry journal article supplement (doi:10.1039/d5sc01030f), 2025-01-01
Supplement: d5sc01030f1.pdf [file d5sc01030f1.pdf]

**Supplementary Information for**  
**Enhancing Binding Affinity Predictions through Efficient Sampling with re-engineered BAR**  
**Method: Test on GPCR Targets**

Minkyu Kim, Jian Jeong, Donghwan Kim, Sangbae Lee\*, and Art E. Cho\*

This document contains:

**Supplementary Information (SI) Theory**

SI Figure S1.

**Supplementary Information (SI) Methods**

Analyses for MD simulation and binding free energy

SI Table S1.

**Supplementary Information (SI) Results**

SI Table S2-S3.

SI Figure S2-S7.

## Supplementary Information (SI) Theory

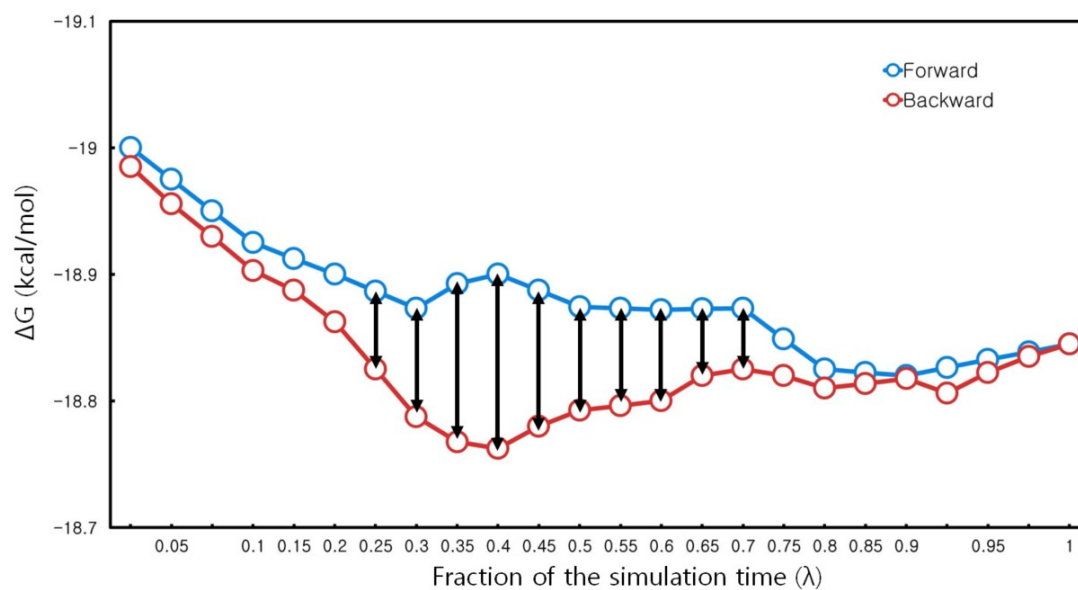

**SI Figure S1.** (Related to main Theory & Method section). Free energy convergence with time. Computed free energy differences are shown as a function of time to access equilibration and convergence. Here, we show free energy estimates resulting both from forward (light blue) time series, and what we would obtain if the data were analyzed in a time-reverse manner (red) using the same amount of data, as discussed in the Method text. As shown in X-axis, 24 scaling factors ( $\lambda$ ) using inequivalent manner (from 0 to 0.1 and from 0.9 to 1) for smooth passing its energy barrier.

## Supplementary Information (SI) Methods

### Analyses for MD simulation and binding free energy

#### Calculating the ligand binding free energy using the alchemical free energy method – BAR (Bennett acceptance ratio)

: We have calculated the binding free energy ( $\Delta G$ ) of ligand and GPCR receptor using the Bennett Acceptance Ratio (BAR) algorithm in the GROMACS package. BAR method combines the information normally used for forward and reverse free energy perturbations. This can be expressed as function of a coupling parameter,  $\lambda$ , which indicates the level of change that has taken place between two states (ligand-bound and unbound), the extent to which the Hamiltonian has been perturbed and the system has been transformed. Simulations conducted at different values of  $\lambda$  allow us to plot a  $\partial H/\partial \lambda$  curve, from which  $\Delta G$  is derived. Transformations from ligand-bound ( $\lambda = 0$ ) to ligand-free ( $\lambda = 1$ ) in our study were performed in non-equidistant  $\lambda$  spacing from 0 to 1 for decoupling Coulombic and van der Waals interaction using 0.8 ns of simulation for each window (SI Figure S1).

#### Key Computational Steps and Parameters

: Binding-free-energy calculations performed with molecular-dynamics (MD) simulations may appear algorithm-agnostic, yet their outcomes still depend sensitively on user-specific protocols. The most critical factor for best results lies in how accurately the setup and equilibration of the protein–ligand complex are designed to reflect the experiments.

Accordingly, we adopted the multi-step equilibration scheme summarized in SI Table S1 to ensure that the solute accurately mirrors experimental conditions. This careful preparation was essential to ensure the reliability of the subsequent MD-based binding free energy calculations.

**SI Table S1.** Multi-Step Preparation Workflow for MD BFEs

| Steps | Explanation         | Restrains           |                     |
|-------|---------------------|---------------------|---------------------|
|       |                     | Position (kcal/mol) | Distance (kcal/mol) |
| Step1 | Energy minimization | X                   | X                   |
| Step2 | Equilibration (NVT) | 5                   | 5                   |
| Step3 | Equilibration (NVT) | 4                   | 5                   |
| Step4 | Equilibration (NpT) | 3                   | 5                   |
| Step5 | Equilibration (NpT) | 2                   | 5                   |
| Step6 | Equilibration (NpT) | 1                   | 5                   |
| Step7 | Equilibration (NpT) | X                   | 5                   |
| Step8 | Equilibration (NpT) | X                   | X                   |
| Step9 | Production (NpT)    | X                   | X                   |

\*X = 0 kcal/mol

Another strength of the BAR method lies in its adaptability through the use of unevenly distributed scaling factors ( $\lambda$ ), unlike other binding free energy methods that rely on fixed or uniformly spaced  $\lambda$  intervals. Instead of employing a uniform  $\lambda$  schedule from 0 to 1, we adopted a non-uniformly distributed  $\lambda$  scheme, placing denser sampling near the endpoints ( $\lambda \approx 0$  and  $\lambda \approx 1$ ). This design ensures sufficient sampling in regions of rapid energy change during the early and late stages of ligand decoupling, where the soft-core potential function exhibits its highest sensitivity. This type of adaptive  $\lambda$  distribution enhances both the numerical stability and accuracy of BAR-based free energy calculations, making it especially well-suited for structurally flexible systems like GPCRs, where careful management of state overlap is crucial.

### Superiority of our MIND-BAR over FEP

: Unlike FEP, the BAR method utilizes both forward and backward perturbation data, which is central to its statistical robustness. Importantly, the scaling factor ( $\lambda$ ) used in BAR does not require equal spacing, allowing it to be redistributed based on state overlap, which is particularly advantageous for complex systems like GPCRs. In GPCR–ligand systems, the high flexibility of the binding pocket necessitates careful sampling, making equilibration and production runs critical prior to accurate binding free energy calculation. For this reason, we applied both position and distance restraints during the equilibration phase to minimize ligand displacement. We then performed five independent production runs using different random seeds and selected the most structurally stable ensemble as the starting point for free energy computation. This protocol produced less variation in output compared to other methods.

**SI Table S2.** Comparative Summary of GPCR BFE Protocols

| Journal               | Chem.Sci.                  | ACS Omega, 2016                        | J. Chem. Inf. Model. 2020         | Angew. Chem. Int. Ed. 2023 |
|-----------------------|----------------------------|----------------------------------------|-----------------------------------|----------------------------|
| Corresponding Authors | A Cho.<br>S Lee.           | AP IJzerman<br>T Beuming               | Cde Graaf<br>G Tresadern          | P Gmeiner<br>J Carlsson    |
| Affiliation           | inCerebro<br>Atomatrix     | Leiden Univ.<br>Schrodinger            | Sosei Heptares<br>Janssen Pharma. | Uppsala Univ.<br>FAU       |
| Method                | MIND-BAR                   | FEP+                                   | FEP+, MMGBSA                      | FEP+                       |
| Target                | $\beta_2$ AR<br>$A_{2A}$ R | $A_{2A}$ R, dOR<br>CXCR4, $\beta_1$ AR | $A_{2A}$ R<br>OX2                 | $\beta_2$ AR               |
| Equilibration         | EM: NVT<br>EQ:PR+DR        | EM: NVT<br>EQ: NPT with PR             | EM: NVT<br>EQ: NPT with PR        | EM: NVT<br>EQ: NPT with PR |
| Production            | 50ns x 5 runs              | No                                     | No                                | No                         |

\*EM: Energy Minimization, EQ: Equilibration. PR: Position restraints. DR: distance restraints.

### Comparison Between MIND-BAR and Other Binding Free Energy Methods, and Its Suitability for GPCRs

: A variety of alchemical binding free energy methods have been applied to transmembrane proteins, particularly GPCRs, which are among the most structurally complex and pharmacologically important membrane targets. In this study, we compared the BAR (Bennett Acceptance Ratio) algorithm—used as the core method—with several other representative approaches, highlighting its distinct advantages for GPCR systems.

- (1) **Use of Both Forward and Backward Data for Enhanced Statistical Accuracy:** GPCRs are flexible, dynamic membrane proteins where ligand binding often induces transitions across multiple conformational states. The MIND-BAR method estimates free energy differences by utilizing both forward ( $A \rightarrow B$ ) and backward ( $B \rightarrow A$ ) perturbation data, resulting in reduced standard error and greater resistance to sampling noise compared to FEP. Therefore, BAR is particularly well-suited for GPCR systems where sufficient state overlap is attainable. (Bennett, C. H. (1976). *J. Comput. Phys.*, 22, 245–268.)
- (2) **Superior Sampling Efficiency and Convergence:** Due to the narrow and flexible nature of GPCR binding pockets, convergence in free energy calculations is often hindered by sampling bias. The MIND-BAR method used in this study integrates data across multiple  $\lambda$  states, improving convergence and minimizing free energy gradient errors, especially at the extreme  $\lambda$  ends. This approach demonstrated greater robustness compared to TI-based methods.
- (3) **Flexibility and Broad Applicability Across Platforms:** MIND-BAR is compatible with various molecular dynamics packages, including GROMACS, AMBER, and CHARMM, and can be applied via built-in or external postprocessing tools. It is particularly effective for GPCR–ligand complexes with well-defined topologies and is fully compatible with dual topology schemes (Lee et al., *J. Phys. Chem. B*, 2014). In contrast, TI requires precise force integration and gradient smoothness, which can be more demanding in flexible membrane protein systems.

- (4) Validated in Real GPCR Applications: MIND-BAR free energy calculations have shown excellent agreement with experimental binding affinities, typically within an RMSE of ~1.0 kcal/mol. The method has been successfully applied to a range of GPCR targets, including A<sub>2A</sub>AR,  $\beta_2$ AR, OX2R, and CXCR4, demonstrating its robustness and growing adoption in structure-based drug design workflows.

**SI Table S3.** Key Strengths of MIND-BAR in GPCR Binding Free-Energy Studies

| Aspect                           | Advantage of MIND-BAR                                               | Comparison with Others.                          |
|----------------------------------|---------------------------------------------------------------------|--------------------------------------------------|
| Statistical Accuracy             | Utilizes both forward and backward data; minimum variance estimator | FEP is uni-directional and prone to bias         |
| Sampling Convergence             | Integrates across $\lambda$ states; improves slow convergence       | TI is sensitive to gradient smoothness           |
| Computational Efficiency         | High accuracy relative to cost; easy post-processing automation     | LIE is simple, but less accurate                 |
| Structural Suitability for GPCRs | Handles flexible binding pockets effectively                        | TI requires smooth potential transitions         |
| Validation in GPCR systems       | Widely applied to real GPCR targets; robust performance shown       | BAR is increasingly used as a standard algorithm |

#### Representative structure from RMSD-based clustering

: The structures shown in figures of main article are representative structures from the highest population conformation cluster for each ligand-GPCR complex. We first clustered the conformations in the MD trajectories by their root mean square deviation (RMSD) of the C $\alpha$  atoms in the transmembrane helices, using the *gmx cluster* module in GROMACS with *gromos* clustering algorithm. An RMSD cut-off of 2.0 Å was used on the MD trajectories containing snapshots taken every 20 ps. The representative structure was calculated as the frame that has the lowest RMSD compared to the average structure of the most populated conformational cluster.

#### Calculation of RMSD and RMSF

: To compare the relative difference between trajectories and to determine whether each simulation had converged and fluctuated, the C $\alpha$ -RMSD (root means square deviation) and the RMSF (root means square fluctuation) of GPCR were calculated using the *g\_rms* and *g\_rmsf* modules of GROMACS. The average structure calculated from the combined trajectories (3 trajectories) of the last 30ns for each system was used as the reference structure for the RMSF calculations.

#### Calculation of SDF (Spatial distribution function)

: The spatial distribution function used for selective agonist movements in the binding site of  $\beta_1$ AR (SI Figure S2) was calculated using program tool '*gmx spatial*' in the GROMACS package, and visualized using PyMOL. This represents the density of nitrogen and oxygen atoms (indicated with the blue and red dots, respectively) within the each ligand over all the MD snapshots.

#### Polar and non-polar ligand-GPCR interaction

: The polar and non-polar interaction energy components shown in the main Figure 2 were calculated using GROMACS. Non-bond interaction energy included the Columbic and Lennard-Jones potentials (as the terms of polar and non-polar interactions) for  $\beta_1$ AR receptor for each protein-ligand interaction energy. For this, first, we identified all systems that make contacts in more than 40% from the last 30 ns of MD simulation snapshots. The polar interactions (hydrogen bond interactions) were calculated between hetero-atoms (N, O) with a distance cutoff of 3.5 Å and angle cutoff of 120° using our in-house tool. The van der Waals (vdW, non-polar) contacts were calculated with a distance cutoff of 4.0 Å between two sidechain carbon atoms using VMD tool '*contactFreq.tcl*'.

### Volume of the ligand binding site

: We have calculated the volume of the ligand binding site in two different conformational states of  $\beta_1$ AR (for main Figure 2) and  $A_1$ AR/ $A_3$ AR (for main Figure 4) across all the MD trajectories. We first defined a  $12 \times 12 \times 12 \text{ \AA}^3$  box centered at the centroid position of the ligand structure after equilibration. After filling the defined box with grid points at  $1 \text{ \AA}$  resolution, we systematically deleted the grid points that overlapped with any atom, based on the van der Waals clashes. A spherical region positioned at the box center with  $4 \text{ \AA}$  radius was defined as the core region. These steps were carried out automatically by program POVME.

### MIND mutation for *in-silico* Mutagenesis

: To introduce specific mutations from wild-type protein residues, we employed our in-house **MIND-mutation** tool. This proprietary method is designed to be optimized for the CHARMM force field used in this study and supports all 20 standard amino acids. For each desired single-point mutation, multiple rotamers were generated from the wild-type residue, and the most stable conformer was selected based on calculated interactions with surrounding protein residues and/or ligand atoms within a  $5 \text{ \AA}$  radius.

**SI Table S4.** Overview of datasets used in case individual study.

| Cases | Target       | PDB  | State           | Resolution ( $\text{\AA}$ ) | Ligand                | RSCC | RSR  |
|-------|--------------|------|-----------------|-----------------------------|-----------------------|------|------|
| Case1 | $\beta_1$ AR | 2Y03 | Inactive        | 2.85                        | Isoprenaline          | 0.97 | 0.21 |
|       |              | 6H7J | Active          | 2.80                        | Isoprenaline          | 0.92 | 0.21 |
|       |              | 2Y04 | Inactive        | 3.05                        | Salbutamol            | 0.97 | 0.28 |
|       |              | 6H7M | Active          | 2.76                        | Salbutamol            | 0.93 | 0.22 |
|       |              | 2Y01 | Inactive        | 2.60                        | Dobutamine            | 0.96 | 0.19 |
|       |              | 6H7L | Active          | 2.70                        | Dobutamine            | 0.92 | 0.20 |
|       |              | 4BVN | Inactive        | 2.10                        | Cyanopindolol         | 0.96 | 0.11 |
|       |              | 6H7O | Active          | 2.80                        | Cyanopindolol         | 0.98 | 0.16 |
| Case2 | $A_1$ AR     | 5N2S | Inactive        | 3.30                        | PSB36                 | 0.92 | 0.27 |
|       | $A_{2A}$ AR  | 5N2R | Inactive        | 2.80                        | PSB36                 | 0.94 | 0.24 |
| Case3 | $A_1$ AR     | 5UEN | Inactive        | 3.20                        | DU172                 | 0.83 | 0.37 |
|       | $A_3$ AR     | -    | Inactive        | -                           | Homology <sup>a</sup> |      |      |
| Case4 | $A_{2A}$ AR  | 3EML | Inactive (wild) | 2.60                        | ZM241385              | 0.94 | 0.17 |
|       |              | 3PWH | Inactive (MUT)  | 3.30                        | ZM241385              | 0.85 | 0.39 |

<sup>a</sup> $A_3$ AR (old pdb code of 1OEA) was homologically modeled using the available AlphaFold2 predicted structure from the Uniprot website, as it has been removed from the PDB entry.

## Supplementary Information (SI) Results

**SI Table S5.** (Related to main Figure 1)

| $\beta_1$ AR | exp (pK <sub>D</sub> ) | $\Delta G$ (kcal/mol) | PDB code |
|--------------|------------------------|-----------------------|----------|
| ISO-L        | 8.16                   | -12.35                | 2Y03     |
| ISO-H        | 8.62                   | -16.13                | 6H7J     |
| SAL-L        | 5.92                   | -11.05                | 2Y04     |
| SAL-H        | 7.8                    | -13.5                 | 6H7M     |
| DOB-L        | 6.86                   | -12.98                | 2Y01     |
| DOB-H        | 8.97                   | -15.83                | 6H7L     |
| CYP-L        | 9.99                   | -16.21                | 4BVN     |
| CYP-H        | 9.85                   | -15.99                | 6H7O     |

**SI Table S6.** (Related to main Figure 2) Percentage analysis of polar and non-polar interactions between respective agonist and the active or inactive state of  $\beta_1$ AR, based on the entire MD trajectories. Polar interactions are shown in red, while non-polar interactions are in blue.

| Isoprenaline |                 |                 | Dobutamine |      |     | Salbutamol |     |      | Cyano-pindolol |      |     |
|--------------|-----------------|-----------------|------------|------|-----|------------|-----|------|----------------|------|-----|
|              | AC <sup>a</sup> | IN <sup>b</sup> |            | AC   | IN  |            | AC  | IN   |                | AC   | IN  |
| F201         | 59%             | 53%             | F201       | 96%  | 41% | F201       | 62% | 85%  | F201           | 72%  | 54% |
| D121         | 79%             | 72%             | D121       | 100% | 74% | D121       | 88% | 100% | F325           | 58%  | -   |
| F306         | 49%             | 59%             | V122       | 54%  | 58% | N329       | 54% | 59%  | D121           | 100% | 92% |
| N329         | 58%             | 54%             | F307       | 77%  | 62% | V125       | 61% | -    | F306           | 77%  | 48% |
| V125         | 54%             | -               | S211       | 98%  | -   | V122       | 57% | 66%  | Y333           | -    | 74% |
| V122         | 54%             | 55%             | S212       | -    | 48% | F307       | 62% | 41%  | V125           | 62%  | 51% |
| S211         | -               | 77%             | W330       | 93%  | 45% | S215       | 90% | 93%  | V122           | 75%  | 63% |
| S215         | -               | 93%             | G98        | 95%  | -   | S211       | 81% | 61%  | F307           | 89%  | 90% |
| F307         | 52%             | 60%             | V102       | 40%  | -   | N310       | -   | 61%  | S211           | 100% | 93% |
| N310         | 53%             | 54%             | F306       | 68%  | 72% | F306       | 85% | 42%  | S212           | 95%  | -   |
|              |                 |                 | N310       | 94%  | 52% |            |     |      | N310           | -    | 85% |
|              |                 |                 | V326       | 54%  | -   |            |     |      | N329           | 83%  | 77% |

<sup>a</sup>AC: Active, <sup>b</sup>IN: Inactive



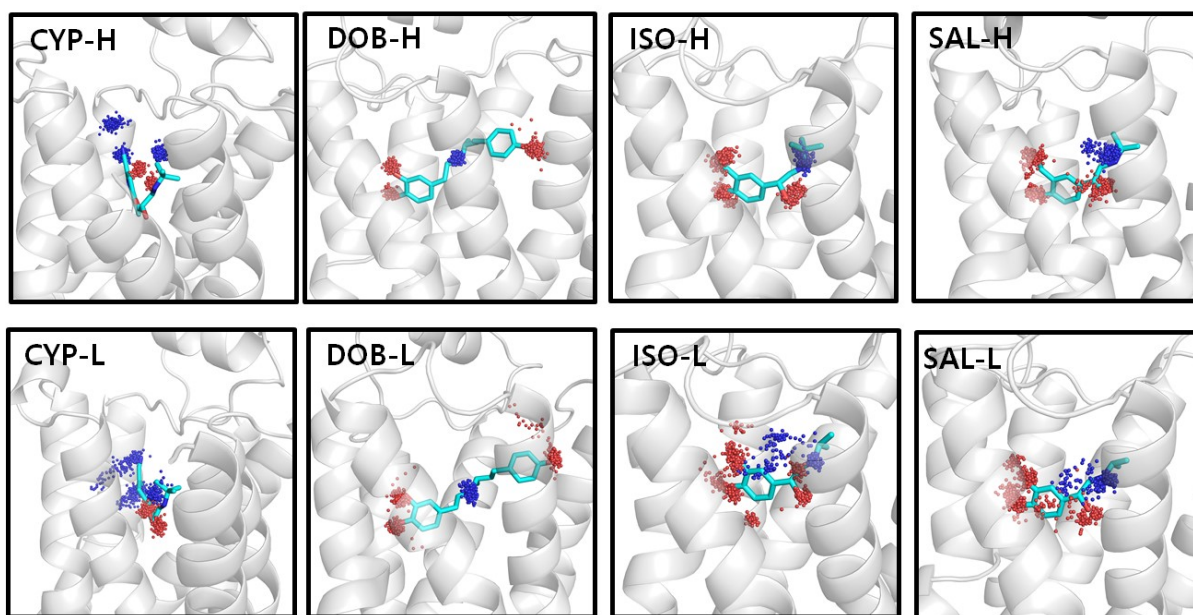

**SI Figure S2.** (Related to main Figure 2) Spatial distribution function (SDF) as the mobility estimation of selective agonists in the inactive and active states of  $\beta_1$ AR. SDF of the selected agonists calculated centering on the nitrogen atom (as a blue dot) and the oxygen atom (as a red dot) of each ligand.

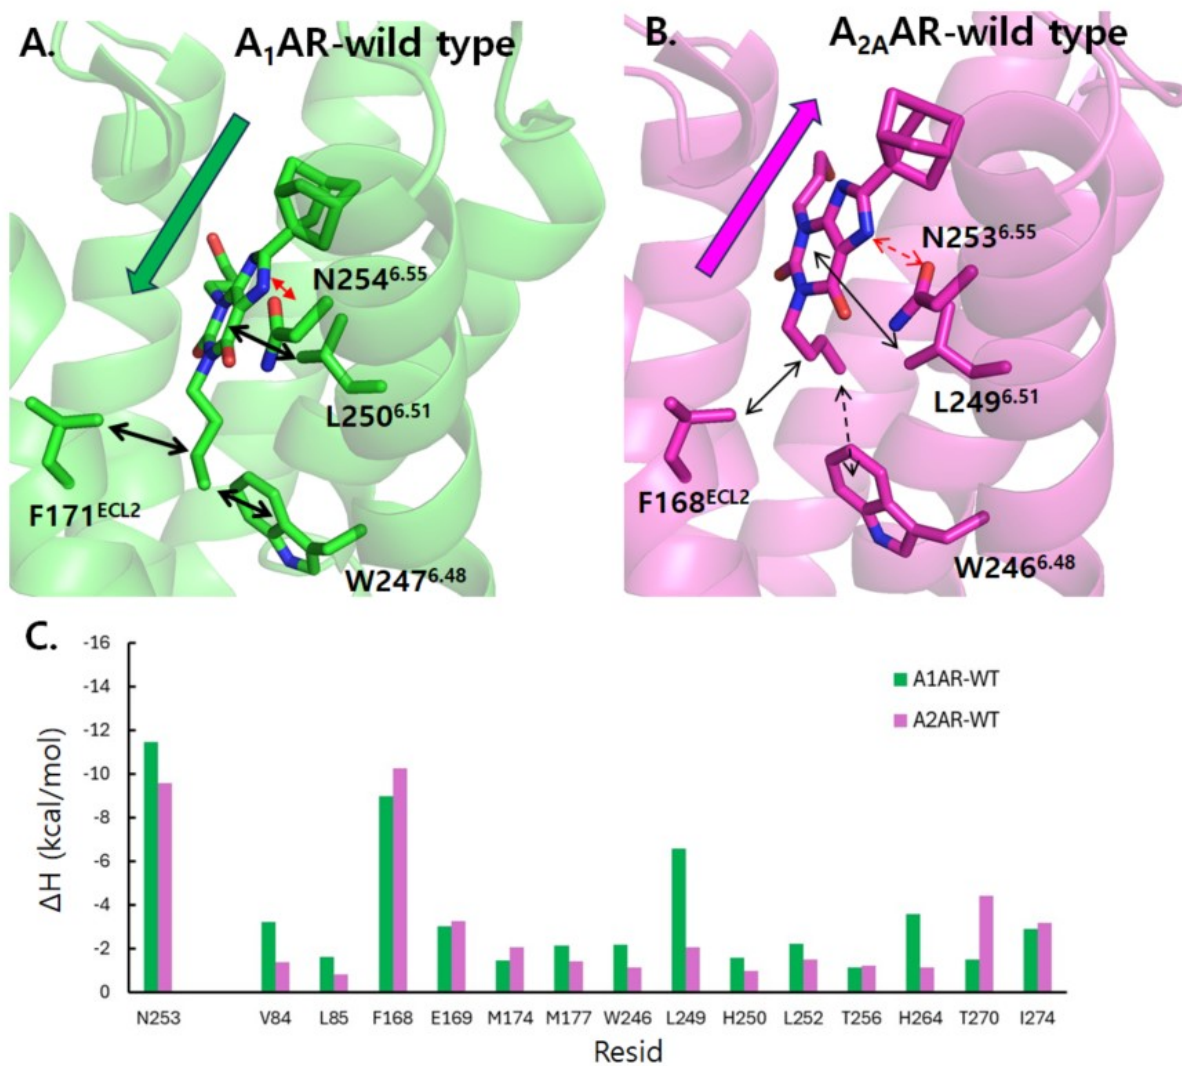

**SI Figure S3.** (related to main Figure 3). PSB36 ligand contacts with A<sub>1</sub>AR-WT (**A**) and A<sub>2A</sub>AR-WT (**B**), and non-bonded interaction energy between ligand and the residues in the binding site of A<sub>1</sub>AR-WT (green) and A<sub>2A</sub>AR-WT (magenta) (**C**).

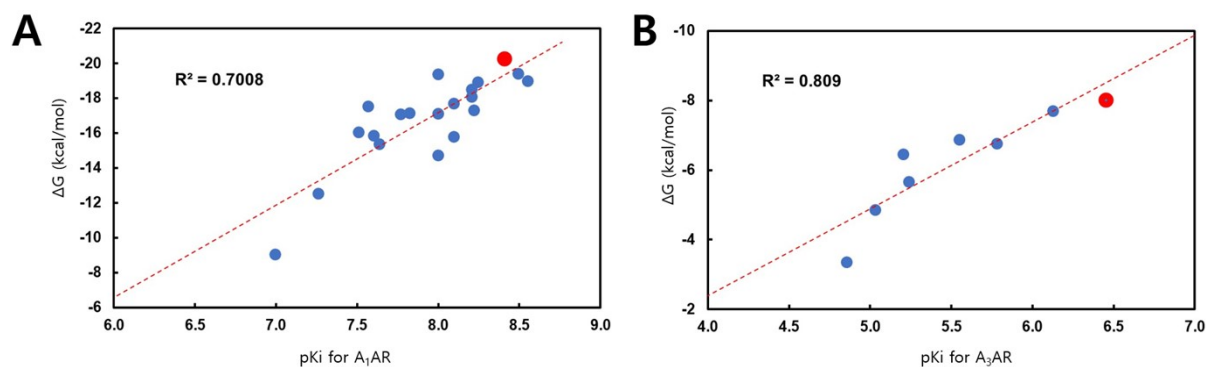

**SI Figure S4.** (Related to main Figure 5). Binding free energy calculations of antagonist derivatives bound to A<sub>1</sub>AR and A<sub>3</sub>AR. **A-B.** Correlation between the calculated binding free energies of A<sub>1</sub>AR-derivatives (**A**) and A<sub>3</sub>AR-derivatives (**B**) with their experimental K<sub>i</sub> values. For Figure 5 in the main text, we re-scaled the X- and Y-axes uniformly to visualize the relative binding strengths of the derivatives for A<sub>1</sub>AR and A<sub>3</sub>AR more clearly.

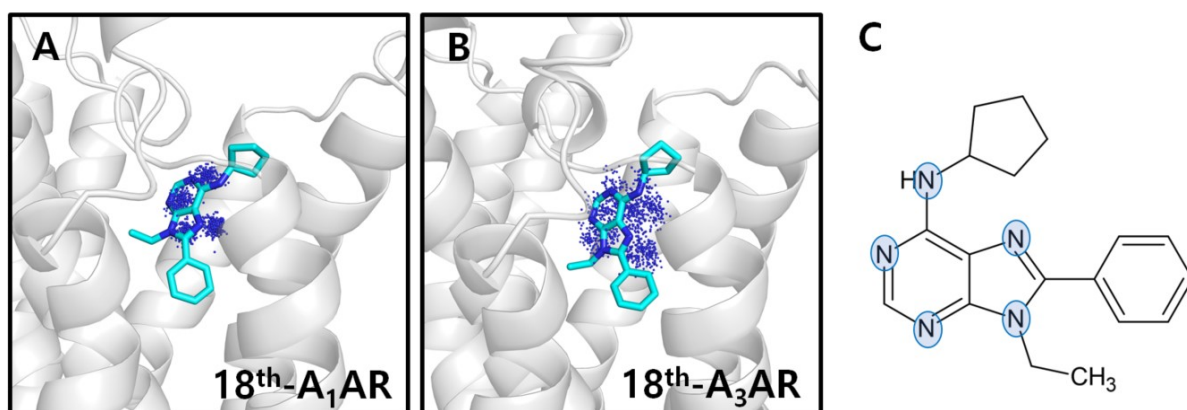

**SI Figure S5.** (Related to main Table 2 and main Figure 5). Analysis of Spatial distribution function (SDF) for 18<sup>th</sup> derivative bound to A<sub>1</sub>AR and A<sub>3</sub>AR complexes, respectively (**A-B**). SDF calculation was centered on the nitrogen atom from main scaffold, blue circles in **C**.

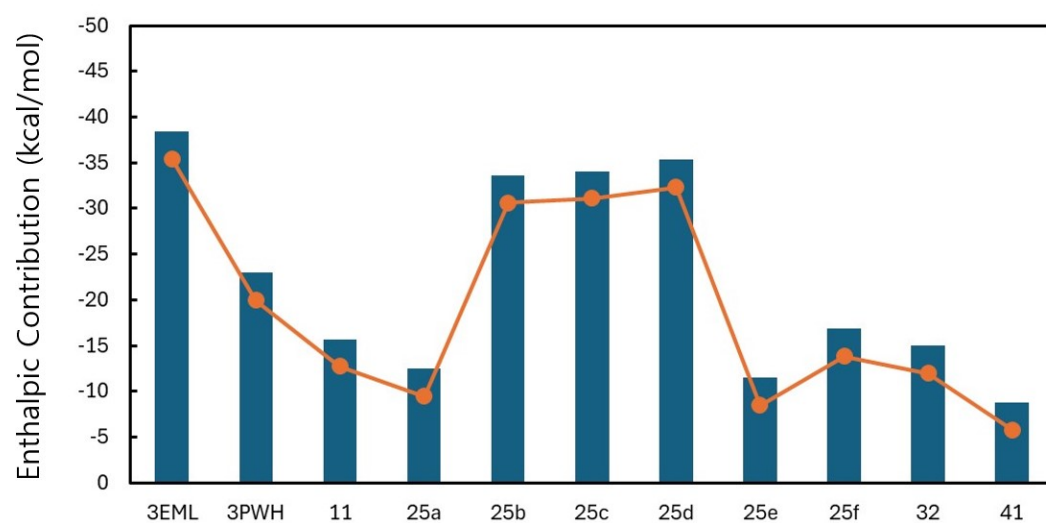

**SI Figure S6.** (Related to main Table 2 and main Figure 5). The enthalpic contribution ( $\Delta H$ ) expressed as the non-bonded interaction (the sum of electrostatic and van der Waals terms) using the entire MD trajectory of 11 systems for Case 4 study.

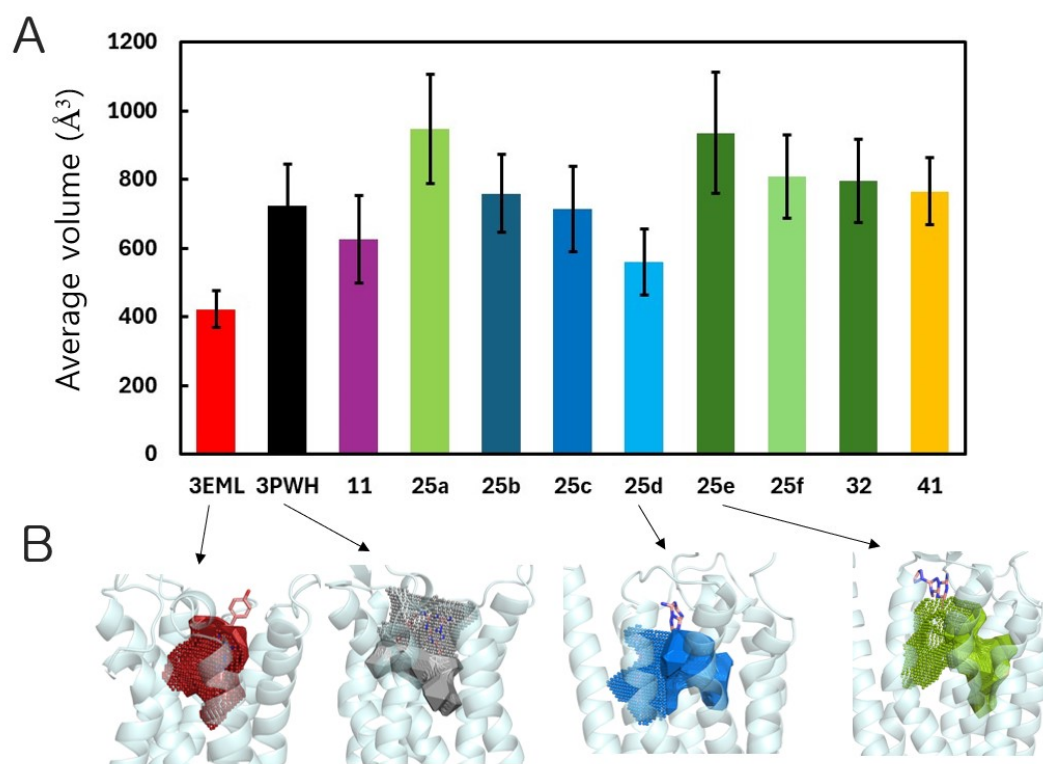

**SI Figure S7.** (Related to main Table 2 and main Figure 5). **A.** The average volume of the ligand binding site in a total of 11  $A_{2A}AR$  systems studied for Case 4. All calculations were carried out by program POVME. **B.** The ligand volume representations with representative structures (extracted from the most populated cluster) of  $A_{2A}AR$  bound to ZMAs in the wild type (red), thermostabilized mutant (black), 25d (cyan), and 25e (dark green) derivatives.
